# Supplementary material for: Phosphonium ionic liquids as greener electrolytes for poly(vinyl chloride)-based ionic conducting polymers
Source: Royal Society of Chemistry journal article supplement (doi:10.1039/c6ra14528k), 2016-01-01
Supplement: c6ra14528k1.pdf [file c6ra14528k1.pdf]

1 **Supplementary material**

2  
3 **Phosphonium ionic liquids as greener electrolytes for poly(vinyl chloride)-based ionic**  
4 **conducting polymers**

5  
6 A.M.A. Dias<sup>1\*</sup>, S. Marceneiro<sup>1</sup>, H.D. Johansen<sup>2</sup>, M.M. Barsan<sup>2</sup>, C.M.A. Brett<sup>2\*</sup>, H.C. de Sousa<sup>1\*</sup>

7 *<sup>1</sup>CIEPQPF, Chemical Engineering Department, Faculty of Sciences and Technology,*  
8 *University of Coimbra, Rua Sílvio Lima, Pólo II – Pinhal de Marrocos, 3030-790 Coimbra,*  
9 *Portugal*

10 *<sup>2</sup>Department of Chemistry, Faculty of Sciences and Technology, University of Coimbra,*  
11 *3004-535 Coimbra, Portugal*

12  
13  
14  
15  
16  
17

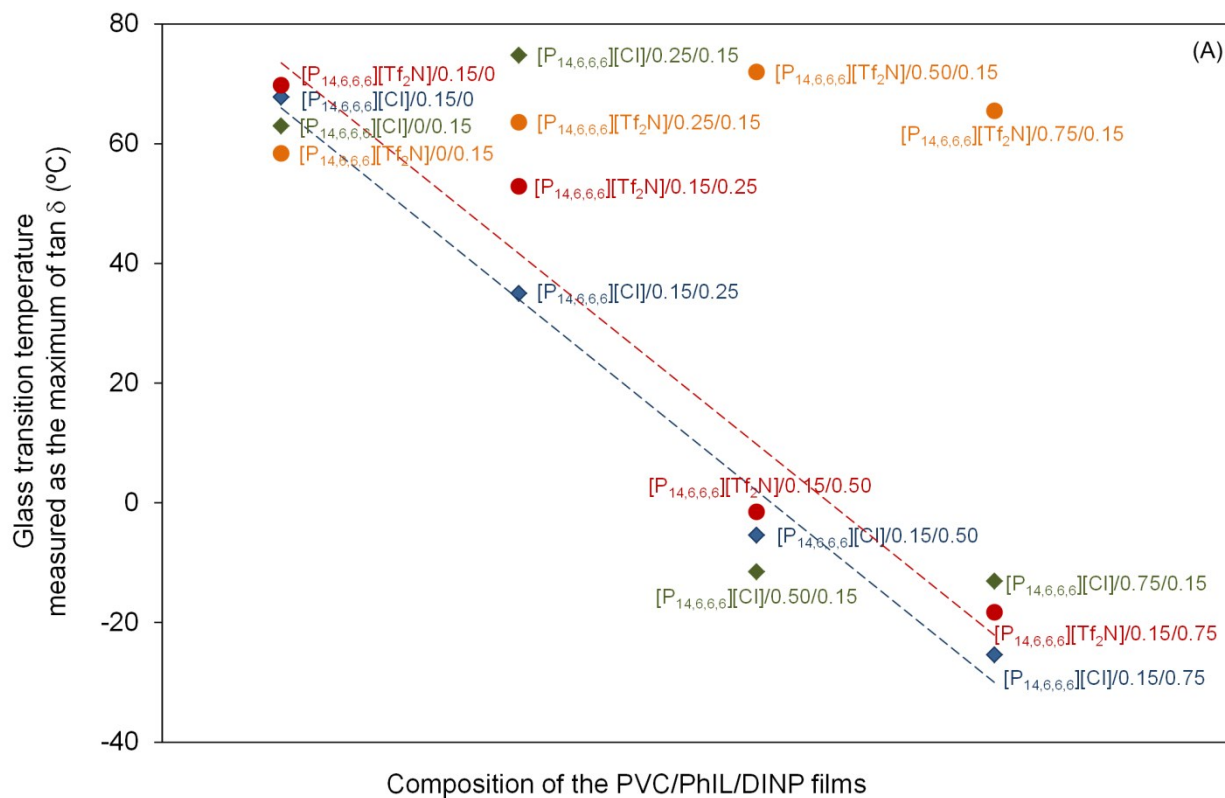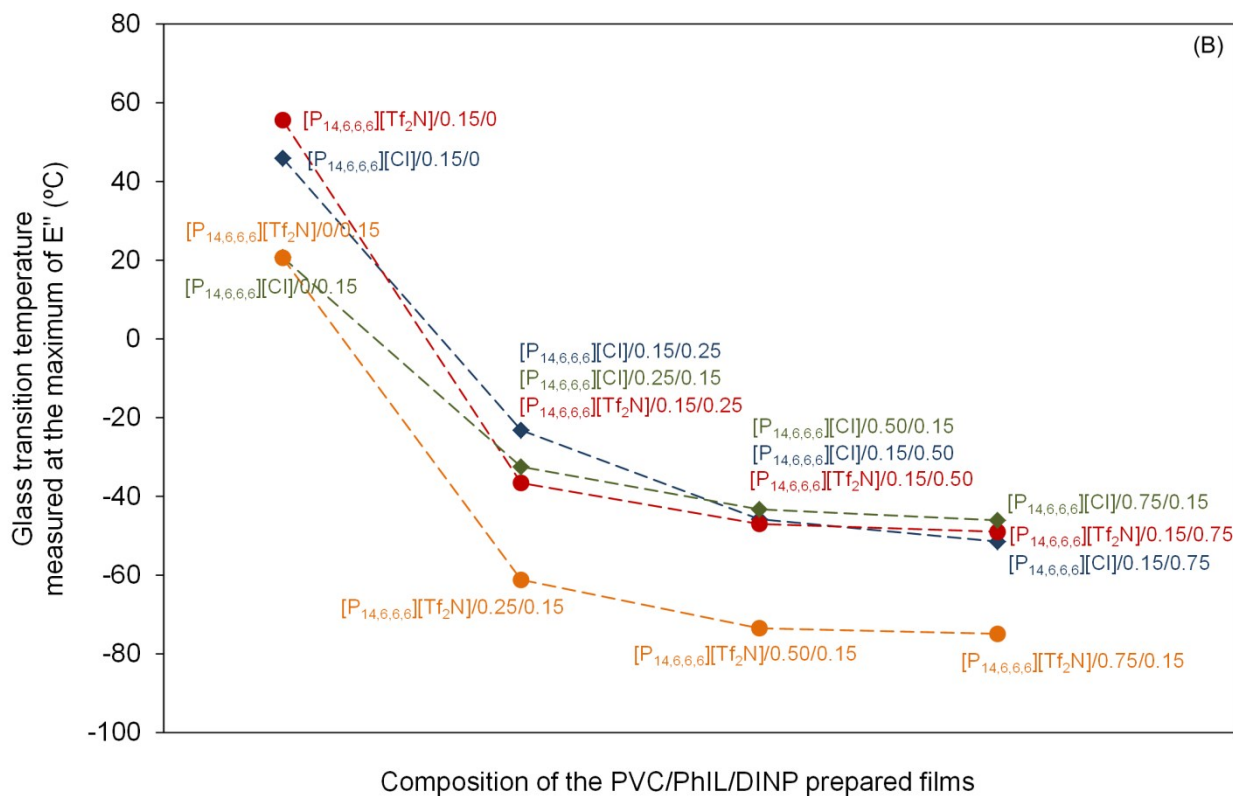

18  
19  
20

21 **Figure S1.** Glass transition temperatures measured by DMTA for PVC films with different  
22 PhILs/DINP compositions and defined as the maximum of  $\tan \delta$  (A) and maximum of the loss  
23 modulus,  $E''$  (B).

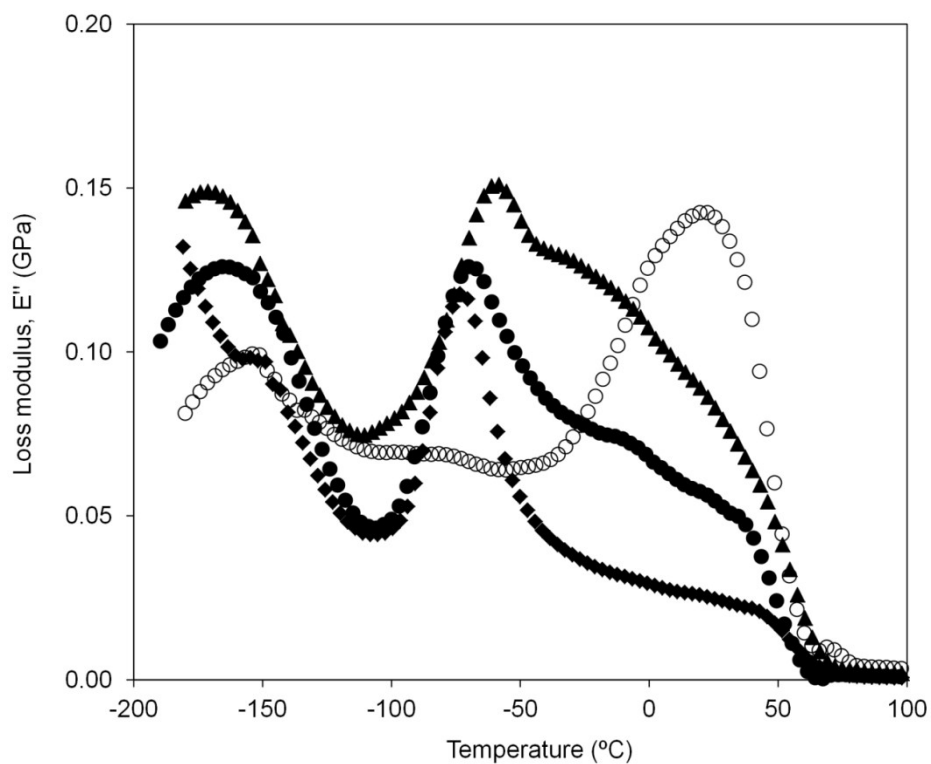

24

25 **Figure S2.** Loss modulus profiles for PVC films loaded with fixed amount of plasticizer (DINP) and  
 26 different amounts of trihexyl(tetradecyl) phosphonium bis(trifluoromethylsulfonyl)imide,  
 27  $[P_{14,6,6,6}][Tf_2N]$ : (○)  $[P_{14,6,6,6}][Tf_2N]/0/0.15$ ; (▲)  $[P_{14,6,6,6}][Tf_2N]/0.15/0.15$ ; (●)  $[P_{14,6,6,6}][Tf_2N]/0.50/0.15$   
 28 and (◆)  $[P_{14,6,6,6}][Tf_2N]/0.75/0.15$ .
